# Supplementary material
Source: publisher site journal article supplement (https://www.dovepress.com/article/473451)
Supplement: Supplementary file 1 [file get_supplementary_file.php]

**Table S1** Descriptive information of covariates.

| Covariance | *N* = 756 |  |
| --- | --- | --- |
| **Gender** a |  |  |
| Boy | 270 | 35.71% |
| Girl | 486 | 64.29% |
| **Residence** b |  |  |
| Rural | 578 | 76.46% |
| City | 178 | 23.54% |
| **Class Cadre** c |  |  |
| Being a class cadre | 165 | 21.83% |
| Not being a class cadre | 591 | 78.17% |
| **Father’s Educational Level** |  |  |
| Not receiving education | 7 | 0.93% |
| Primary school | 307 | 40.61% |
| Junior secondary education | 348 | 46.03% |
| High school education | 80 | 10.58% |
| University education | 14 | 1.85% |
| **Mather’s Educational Level** |  |  |
| Not receiving education | 86 | 11.38% |
| Primary school | 354 | 46.83% |
| Junior secondary education | 251 | 33.20% |
| High school education | 59 | 7.80% |
| University education | 6 | 0.79% |
| Note. a 0 = male, 1= female; b 0 = rural, 1= urban; c 0 = being a class cadre, 1 = not being a class cadre. | | |

**Table S2** Correlations among the components of variables.

|  | 1 | 2 | 3 | 4 | 5 | 6 | 7 | 8 | 9 | 10 | 11 |
| --- | --- | --- | --- | --- | --- | --- | --- | --- | --- | --- | --- |
| 1. Gender |  |  |  |  |  |  |  |  |  |  |  |
| 1. Class cadre | 0.054 |  |  |  |  |  |  |  |  |  |  |
| 1. Residence | 0.005 | -0.060 |  |  |  |  |  |  |  |  |  |
| 1. Fa’ E | -0.004 | -0.050 | -0.057 |  |  |  |  |  |  |  |  |
| 1. Ma’ E | -0.025 | -0.095** | -0.053 | 0.385*** |  |  |  |  |  |  |  |
| 1. T1GBJW | 0.118** | -0.026 | 0.048 | 0.010 | 0.013 |  |  |  |  |  |  |
| 1. T2GBJW | 0.140*** | -0.005 | 0.055 | -0.002 | -0.001 | 0.561*** |  |  |  |  |  |
| 1. T3GBJW | 0.098** | -.088* | 0.053 | -0.004 | 0.040 | 0.473*** | 0.541*** |  |  |  |  |
| 1. T1IBJW | 0.008 | -0.064 | 0.067 | 0.096** | 0.097** | 0.523*** | 0.442*** | 0.348*** |  |  |  |
| 1. T2IBJW | 0.005 | -0.044 | 0.052 | 0.061 | 0.062 | 0.412*** | 0.641*** | 0.454*** | 0.540*** |  |  |
| 1. T3IBJW | 0.016 | -0.097** | 0.062 | 0.063 | 0.089* | 0.334*** | 0.417*** | 0.701*** | 0.431*** | 0.479*** |  |
| 1. T1SSS | -0.098** | -0.171*** | 0.075* | 0.129*** | 0.214*** | 0.173*** | 0.143*** | 0.165*** | 0.255*** | 0.235*** | 0.226*** |
| 1. T2SSS | -0.095** | -0.222*** | 0.055 | 0.147*** | 0.205*** | 0.131*** | 0.159*** | 0.148*** | 0.244*** | 0.250*** | 0.227*** |
| 1. T3SSS | -0.031 | -0.175*** | 0.056 | 0.157*** | 0.210*** | 0.152*** | 0.178*** | 0.224*** | 0.190*** | 0.222*** | 0.285*** |
| 1. T1SRL-P | 0.051 | -0.014 | 0.013 | 0.053 | 0.033 | 0.279*** | 0.243*** | 0.239*** | 0.258*** | 0.247*** | 0.205*** |
| 1. T2SRL-P | 0.006 | -0.032 | -0.034 | -0.018 | -0.042 | 0.241*** | 0.308*** | 0.226*** | 0.219*** | 0.307*** | 0.192*** |
| 1. T3SRL-P | 0.040 | -0.071 | 0.091* | 0.043 | 0.066 | 0.206*** | 0.221*** | 0.296*** | 0.155*** | 0.228*** | 0.255*** |
| 1. T1SRL-M | 0.153*** | -0.056 | 0.011 | 0.069 | 0.053 | 0.256*** | 0.229*** | 0.230*** | 0.243*** | 0.191*** | 0.218*** |
| 1. T2SRL-M | 0.101** | -0.029 | -0.029 | 0.047 | 0.020 | 0.292*** | 0.372*** | 0.299*** | 0.257*** | 0.351*** | 0.267*** |
| 1. T3SRL-M | 0.150*** | -0.061 | 0.067 | 0.061 | 0.103** | 0.228*** | 0.226*** | 0.306*** | 0.172*** | 0.196*** | 0.237*** |
| 1. T1SRL-R | 0.004 | -0.028 | -0.016 | -0.011 | 0.022 | 0.217*** | 0.160*** | 0.163*** | 0.185*** | 0.151*** | 0.131*** |
| 1. T2SRL-R | -0.027 | -0.068 | 0.043 | -0.026 | 0.025 | 0.253*** | 0.284*** | 0.218*** | 0.240*** | 0.317*** | 0.212*** |
| 1. T3SRL-R | 0.044 | -0.040 | 0.042 | 0.023 | .083* | 0.186*** | 0.181*** | 0.256*** | 0.174*** | 0.196*** | 0.219*** |
| Note. *N* = 756, ****p* < 0.001, ***p* < 0.01, **p* < 0.01.  Abbreviation: Fa’ E = father’s educational level, Ma’ E = mather’s educational level; T1 = time 1, T2 = time 2, T3 = time 3; GBJW = general belief in a just world, IBJW = individual belief in a just world, SSS = subjective social status, SRL-P = plan of self-regulated learning, SRL-M = monitor of self-regulated learning, SRL-R = review of self-regulated learning. | | | | | | | | | | | |

|  | 12 | 13 | 14 | 15 | 16 | 17 | 18 | 19 | 20 | 21 | 22 |
| --- | --- | --- | --- | --- | --- | --- | --- | --- | --- | --- | --- |
| 1. Gender |  |  |  |  |  |  |  |  |  |  |  |
| 1. Class cadre |  |  |  |  |  |  |  |  |  |  |  |
| 1. Residence |  |  |  |  |  |  |  |  |  |  |  |
| 1. Fa’ E |  |  |  |  |  |  |  |  |  |  |  |
| 1. Ma’ E |  |  |  |  |  |  |  |  |  |  |  |
| 1. T1GBJW |  |  |  |  |  |  |  |  |  |  |  |
| 1. T2GBJW |  |  |  |  |  |  |  |  |  |  |  |
| 1. T3GBJW |  |  |  |  |  |  |  |  |  |  |  |
| 1. T1IBJW |  |  |  |  |  |  |  |  |  |  |  |
| 1. T2IBJW |  |  |  |  |  |  |  |  |  |  |  |
| 1. T3IBJW |  |  |  |  |  |  |  |  |  |  |  |
| 1. T1SSS |  |  |  |  |  |  |  |  |  |  |  |
| 1. T2SSS | 0.749*** |  |  |  |  |  |  |  |  |  |  |
| 1. T3SSS | 0.657*** | 0.759*** |  |  |  |  |  |  |  |  |  |
| 1. T1SRL-P | 0.323*** | 0.273*** | 0.281*** |  |  |  |  |  |  |  |  |
| 1. T2SRL-P | 0.236*** | 0.266*** | 0.210*** | 0.574*** |  |  |  |  |  |  |  |
| 1. T3SRL-P | 0.287*** | 0.301*** | 0.326*** | 0.460*** | 0.450*** |  |  |  |  |  |  |
| 1. T1SRL-M | 0.271*** | 0.215*** | 0.220*** | 0.619*** | 0.411*** | 0.340*** |  |  |  |  |  |
| 1. T2SRL-M | 0.277*** | 0.308*** | 0.270*** | 0.510*** | 0.669*** | 0.413*** | 0.540*** |  |  |  |  |
| 1. T3SRL-M | 0.284*** | 0.273*** | 0.319*** | 0.425*** | 0.388*** | 0.712*** | 0.446*** | 0.498*** |  |  |  |
| 1. T1SRL-R | 0.271*** | 0.229*** | 0.207*** | 0.526*** | 0.410*** | 0.347*** | 0.510*** | 0.379*** | 0.339*** |  |  |
| 1. T2SRL-R | 0.271*** | 0.320*** | 0.261*** | 0.469*** | 0.578*** | 0.403*** | 0.422*** | 0.634*** | 0.417*** | 0.485*** |  |
| 1. T3SRL-R | 0.208*** | 0.224*** | 0.258*** | 0.394*** | 0.399*** | 0.638*** | 0.380*** | 0.426*** | 0.688*** | 0.400*** | 0.461*** |
| Note. *N* = 756, ****p* < 0.001, ***p* < 0.01, **p* < 0.01.  Abbreviation: Fa’ E = father’s educational level, Ma’ E = mather’s educational level; T1 = time 1, T2 = time 2, T3 = time 3; GBJW = general belief in a just world, IBJW = individual belief in a just world, SSS = subjective social status, SRL-P = plan of self-regulated learning, SRL-M = monitor of self-regulated learning, SRL-R = review of self-regulated learning. | | | | | | | | | | | |

**Table S3** Descriptive information of different profiles of covariates in different times.

| Covariance | *N* = 756 | | | | | | | | |
| --- | --- | --- | --- | --- | --- | --- | --- | --- | --- |
|  | T1 | | | | | | T2 | | |
|  | P1 |  | P2 |  | P3 |  | P1 |  | P2 |
| **Gender** a |  |  |  |  |  |  |  |  |  |
| Boy | 42 | 5.56% | 141 | 18.65% | 87 | 11.51% | 77 | 10.19% | 57 |
| Girl | 55 | 7.28% | 249 | 32.94% | 182 | 24.07% | 166 | 21.96% | 69 |
| **Residence** b |  |  |  |  |  |  |  |  |  |
| Rural | 7 | 0.93% | 38 | 5.03% | 25 | 3.31% | 25 | 3.31% | 13 |
| City | 90 | 11.90% | 352 | 46.56% | 244 | 32.28% | 218 | 28.84% | 113 |
| **Class Cadre** c |  |  |  |  |  |  |  |  |  |
| Being a class cadre | 18 | 2.38% | 78 | 10.32% | 69 | 9.13% | 60 | 7.94% | 26 |
| Not being a class cadre | 79 | 10.45% | 312 | 41.27% | 200 | 26.46% | 183 | 24.21% | 100 |
| **Father’s Educational Level** |  |  |  |  |  |  |  |  |  |
| Not receiving education | 1 | 0.13% | 4 | 0.53% | 2 | 0.26% | 2 | 0.26% | 0 |
| Primary school | 42 | 5.56% | 172 | 22.75% | 93 | 12.30% | 96 | 12.70% | 57 |
| Junior secondary education | 38 | 5.03% | 173 | 22.88% | 137 | 18.12% | 112 | 14.81% | 58 |
| High school education | 13 | 1.72% | 36 | 4.76% | 31 | 4.10% | 27 | 3.57% | 10 |
| University education | 3 | 0.40% | 5 | 0.66% | 6 | 0.79% | 6 | 0.79% | 1 |
| **Mather’s Educational Level** |  |  |  |  |  |  |  |  |  |
| Not receiving education | 1 | 0.13% | 51 | 6.75% | 22 | 2.91% | 20 | 2.65% | 13 |
| Primary school | 45 | 5.95% | 182 | 24.07% | 127 | 16.80% | 118 | 15.61% | 61 |
| Junior secondary education | 32 | 4.23% | 123 | 16.27% | 96 | 12.70% | 86 | 11.38% | 45 |
| High school education | 6 | 0.79% | 32 | 4.23% | 21 | 2.78% | 18 | 2.38% | 7 |
| University education | 1 | 0.13% | 2 | 0.26% | 3 | 0.40% | 1 | 0.13% | 0 |
| Note. a 0 = male, 1= female; b 0 = rural, 1= urban; c 0 = being a class cadre, 1 = not being a class cadre. P1, P2, P3 respectively represent low, moderate, and high levels of belief in a just world.  Abbreviation: T1 = time 1, T2 = time 2, T3 = time 3. | | | | | | | | | |

| Covariance | *N* = 756 | | | | | | | |
| --- | --- | --- | --- | --- | --- | --- | --- | --- |
|  | T2 | | T3 | | | | | |
|  | P3 |  | P1 |  | P2 |  | P3 |  |
| **Gender** a |  |  |  |  |  |  |  |  |
| Boy | 136 | 17.99% | 50 | 6.61% | 143 | 18.92% | 77 | 10.19% |
| Girl | 251 | 33.20% | 64 | 8.47% | 259 | 34.26% | 163 | 21.56% |
| **Residence** b |  |  |  |  |  |  |  |  |
| Rural | 32 | 4.23% | 17 | 2.25% | 29 | 3.84% | 24 | 3.17% |
| City | 355 | 46.96% | 97 | 12.83% | 373 | 49.34% | 216 | 28.57% |
| **Class Cadre** c |  |  |  |  |  |  |  |  |
| Being a class cadre | 79 | 10.45% | 22 | 2.91% | 76 | 10.05% | 67 | 8.86% |
| Not being a class cadre | 308 | 40.74% | 92 | 12.17% | 326 | 43.12% | 173 | 22.88% |
| **Father’s Educational Level** |  |  |  |  |  |  |  |  |
| Not receiving education | 5 | 0.66% | 1 | 0.13% | 5 | 0.66% | 1 | 0.13% |
| Primary school | 154 | 20.37% | 41 | 5.42% | 175 | 23.15% | 91 | 12.04% |
| Junior secondary education | 178 | 23.54% | 57 | 7.54% | 177 | 23.41% | 114 | 15.08% |
| High school education | 43 | 5.69% | 13 | 1.72% | 40 | 5.29% | 27 | 3.57% |
| University education | 7 | 0.93% | 2 | 0.26% | 5 | 0.66% | 7 | 0.93% |
| **Mather’s Educational Level** |  |  |  |  |  |  |  |  |
| Not receiving education | 53 | 7.01% | 17 | 2.25% | 52 | 6.88% | 17 | 2.25% |
| Primary school | 175 | 23.15% | 46 | 6.08% | 191 | 25.26% | 117 | 15.48% |
| Junior secondary education | 120 | 15.87% | 42 | 5.56% | 127 | 16.80% | 82 | 10.85% |
| High school education | 34 | 4.50% | 9 | 1.19% | 28 | 3.70% | 22 | 2.91% |
| University education | 5 | 0.66% | 0 | 0.00% | 4 | 0.53% | 2 | 0.26% |
| Note. a 0 = male, 1= female; b 0 = rural, 1= urban; c 0 = being a class cadre, 1 = not being a class cadre. P1, P2, P3 respectively represent low, moderate, and high levels of belief in a just world.  Abbreviation: T1 = time 1, T2 = time 2, T3 = time 3. | | | | | | | | |

| **Table S4** Results of longitudinal measurement invariance. |
| --- |

| Model | RMSEA | CFI | TLI | χ2 | *df* | χ2/df | ∆RMSEA | ∆CFI | ΔTLI |
| --- | --- | --- | --- | --- | --- | --- | --- | --- | --- |
| Belief in a just world | | | | | | | | | |
| Time 1 (*N* = 756) | .073 | .877 | .850 | 323.378 | 64 | 5.053 | Na | Na | Na |
| Time 2 (*N* = 756) | .069 | .921 | .904 | 293.015 | 64 | 4.578 | Na | Na | Na |
| Time 3 (*N* = 756) | .070 | .917 | .899 | 197.991 | 64 | 3.094 | Na | Na | Na |
| Configural invariance | .039 | .932 | .920 | 1325.372 | 625 | 2.121 | Na | Na | Na |
| Weak invariance | .038 | .930 | .920 | 1370.252 | 649 | 2.111 | .001 | .002 | .000 |
| Strong invariance | .042 | .913 | .905 | 1569.731 | 675 | 2.326 | -.004 | -.017 | -.015 |
| Partial strong invariance (1, 2, 10) | .040 | .921 | .912 | 1488.197 | 669 | 2.225 | -.002 | .009 | .008 |
| Subjective social status | | | | | | | | | |
| Configural invariance | .039 | .974 | .966 | 356.284 | 165 | 2.159 | Na | Na | Na |
| Weak invariance | .038 | .973 | .968 | 373.523 | 177 | 2.110 | -.001 | -.001 | .002 |
| Strong invariance | .039 | .969 | .966 | 415.915 | 191 | 2.178 | .001 | -.004 | -.002 |
| Strict invariance | .040 | .966 | .965 | 451.308 | 205 | 2.202 | .001 | -.003 | -.001 |
| Self-regulated learning | | | | | | | | | |
| Configural invariance | .039 | .925 | .916 | 1893.536 | 880 | 2.152 | Na | Na | Na |
| Weak invariance | .039 | .924 | .917 | 1931.650 | 908 | 2.127 | 0 | -.001 | .001 |
| Strong invariance | .042 | .908 | .903 | 2176.440 | 938 | 2.320 | .003 | -.016 | -.014 |
| Partial strong invariance (3, 4, 11) | .040 | .916 | .911 | 2064.877 | 932 | 2.216 | .001 | -.008 | -.006 |
| Note. *N* = 756.  Abbreviation: RMSEA = Root mean square error of approximation; CFI = Comparative fit index; TLI = Tucker-Lewis index. | | | | | | | | | |


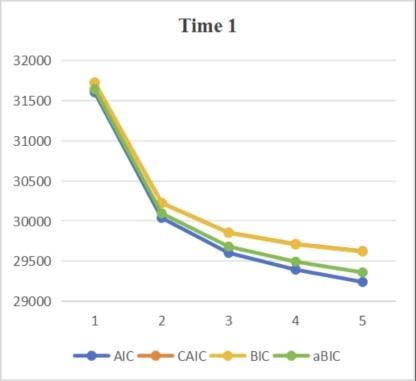

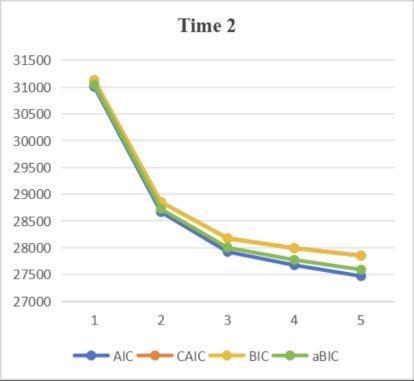

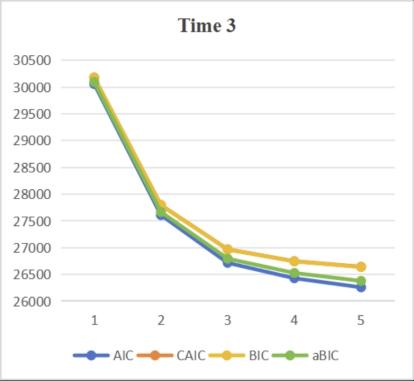


**Figure S1a** & **S1b** & **S1c** *Elbow Plot of the Value of the Information Criteria for Solutions Including Different Number of Latent Profiles from Original Data in Time 1, 2, 3.*
